# Supplementary material for: The Depressiveness, Quality of Life and NEO-FFI Scale in Patients with Selected Genodermatoses
Source: MDPI journal article supplement (doi:10.3390/jcm13061624), 2024-03-12
Supplement: s1 [file s1]

**Supplementary Table S1.** Detailed patient characteristics and their confirmed mutations.

| ID | Age [years] | Sex | Genodermatosis type | Genotype | Scales on exposed parts of the body | Fraction of the body surface covered by lesions | The whole body is covered with scales | The dominant color of the scales | Skin itching | Redness | Exfoliation | Infiltration | Pain (VAS) | Increased sweating     | Sleep disorders | Ectropion | Closing the eyelids | Feeling of ear plugging | Hearing loss | Performance status (Karnofsky scale) |
|----|-------------|-----|---------------------|----------|-------------------------------------|-------------------------------------------------|---------------------------------------|----------------------------------|--------------|---------|-------------|--------------|------------|------------------------|-----------------|-----------|---------------------|-------------------------|--------------|--------------------------------------|
| 1  | 34          | M   | ARCI                | ALOX12B* | +                                   | 0,8                                             | +                                     | Beige                            | 5            | 8       | 7           | +            | 0          | Absolutely no sweating | -               | -         | +                   | +                       | +            | 90                                   |
| 2  | 32          | M   | EEC                 | TP63*    | -                                   | 0,02                                            | -                                     | White                            | 2            | 2       | 2           | +            | 0          | N                      | -               | -         | -                   | -                       | -            | 90                                   |
| 3  | 41          | M   | EV like             | ND       | +                                   | 0,8                                             | +                                     | Brown                            | 8            | 8       | 10          | -            | 0          | +                      | +               | +         | -                   | +                       | -            | 50                                   |
| 4  | 16          | M   | EI                  | KRT10*   | +                                   | 0,98                                            | +                                     | White                            | 1            | 6       | 2           | +            | 2          | -                      | -               | -         | +                   | +                       | -            | 100                                  |
| 5  | 59          | F   | EI                  | ND       | -                                   | 1                                               | -                                     | Multicolored                     | 8            | 7       | 10          | -            | 2          | Absolutely no sweating | +               | -         | +                   | +                       | -            | 100                                  |
| 6  | 47          | M   | IWC                 | KRT10*   | +                                   | 0,9                                             | +                                     | White                            | 9            | 10      | 9           | +            | 8          | -                      | +               | +         | -                   | +                       | +            | 25                                   |
| 7  | 24          | F   | LI                  | TGM1*    | +                                   | 1                                               | +                                     | Multicolored                     | 3            | 4       | 10          | +            | 0          | Absolutely no sweating | -               | +         | -                   | +                       | -            | 80                                   |
| 8  | 57          | M   | LI                  | ND       | +                                   | 1                                               | +                                     | Multicolored                     | 3            | 6       | 8           | +            | 8          | -                      | +               | +         | -                   | +                       | -            | 35                                   |
| 9  | 42          | F   | LI                  | ND       | +                                   | 1                                               | +                                     | Multicolored                     | 10           | 9       | 10          | -            | 8          | -                      | +               | +         | -                   | +                       | +            | 30                                   |
| 10 | 26          | F   | LI                  | TGM1*    | +                                   | 1                                               | +                                     | Multicolored                     | 7            | 4       | 7           | -            | 4          | +                      | -               | +         | -                   | -                       | +            | 85                                   |
| 11 | 59          | F   | LI                  | ND       | +                                   | 1                                               | +                                     | Multicolored                     | 5            | 1       | 5           | -            | 1          | -                      | -               | +         | -                   | +                       | -            | 40                                   |
| 12 | 35          | F   | LI                  | ND       | -                                   | 0,8                                             | -                                     | Transparent                      | 4            | 6       | 9           | -            | 1          | +                      | -               | -         | +                   | -                       | -            | 100                                  |
| 13 | 18          | F   | LI                  | TGM1*    | -                                   | 0,04                                            | -                                     | Brown                            | 8            | 10      | 10          | +            | 0          | -                      | -               | +         | +                   | -                       | -            | 90                                   |
| 14 | 43          | F   | LI                  | ND       | +                                   | 1                                               | +                                     | Multicolored                     | 9            | 6       | 10          | +            | 8          | +                      | +               | -         | +                   | +                       | -            | 95                                   |
| 15 | 34          | F   | LI                  | ND       | +                                   | 0,9                                             | -                                     | Multicolored                     | 4            | 5       | 8           | -            | 1          | +                      | -               | -         | -                   | -                       | -            | 95                                   |
| 16 | 31          | M   | KP                  | ND       | -                                   | 0,04                                            | -                                     | Yellow                           | 5            | 5       | 4           | +            | 8          | N                      | -               | -         | -                   | -                       | -            | 70                                   |
| 17 | 18          | M   | KP                  | KRT1*    | -                                   | 0,06                                            | -                                     | Beige                            | 4            | 3       | 3           | +            | 5          | +                      | -               | -         | -                   | -                       | -            | 90                                   |
| 18 | 26          | M   | KP                  | JUP*     | -                                   | 0,1                                             | -                                     | Yellow                           | 3            | 6       | 7           | -            | 7          | -                      | -               | -         | +                   | -                       | -            | 50                                   |
| 19 | 43          | F   | KP                  | KRT1*    | -                                   | 0,06                                            | -                                     | Yellow                           | 4            | 5       | 3           | +            | 2          | N                      | +               | -         | -                   | -                       | -            | 80                                   |
| 20 | 48          | F   | KP                  | KRT9*    | -                                   | 0,04                                            | -                                     | Yellow                           | 3            | 2       | 1           | +            | 4          | N                      | -               | -         | -                   | -                       | -            | 60                                   |
| 21 | 36          | F   | IV                  | ND       | -                                   | 0,6                                             | -                                     | Beige                            | 8            | 3       | 8           | -            | 1          | N                      | -               | -         | +                   | +                       | -            | 80                                   |
| 22 | 47          | F   | IV                  | ND       | +                                   | 1                                               | -                                     | Beige                            | 4            | 3       | 3           | -            | 7          | +                      | -               | -         | +                   | -                       | -            | 100                                  |

|    |    |   |    |      |   |      |   |              |   |   |    |   |   |   |   |   |   |   |   |     |
|----|----|---|----|------|---|------|---|--------------|---|---|----|---|---|---|---|---|---|---|---|-----|
| 23 | 25 | F | IV | ND   | - | 0,2  | - | Multicolored | 2 | 5 | 6  | - | 1 | - | - | - | + | - | - | 100 |
| 24 | 44 | F | IV | ND   | - | 0,5  | - | Brown        | 2 | 1 | 4  | - | 1 | - | + | - | + | - | - | 100 |
| 25 | 51 | F | IV | FLG* | - | 0,9  | + | Beige        | 6 | 4 | 10 | + | 0 | N | - | - | + | - | - | 100 |
| 26 | 62 | F | IV | ND   | + | 1    | - | Multicolored | 5 | 4 | 5  | - | 3 | + | + | - | + | - | + | 70  |
| 27 | 34 | F | IV | ND   | + | 0,98 | + | Brown        | 6 | 1 | 7  | - | 2 | N | - | - | + | - | - | 100 |
| 28 | 24 | F | IV | ND   | - | 1    | - | Brown        | 7 | 8 | 5  | - | 3 | - | + | - | + | + | - | 95  |
| 29 | 79 | F | IV | ND   | + | 0,01 | + | White        | 3 | 4 | 8  | - | 2 | + | - | - | + | + | + | 50  |
| 30 | 36 | F | IV | ND   | + | 1    | + | Beige        | 3 | 6 | 4  | - | 0 | + | - | - | + | - | - | 100 |

|             |                                            |
|-------------|--------------------------------------------|
| <b>ND</b>   | no data                                    |
| <b>ARCI</b> | Autosomal recessive congenital ichthyosis  |
| <b>EEC</b>  | Ectrodactyly ectodermal dysplasia          |
| <b>EI</b>   | Erythrodermic ichthyosis,                  |
| <b>EV</b>   | Epidermodysplasia verruciformis            |
| <b>I</b>    | Ichthyosis                                 |
| <b>LI</b>   | Lamellar Ichthyosis                        |
| <b>IWC</b>  | Ichthyosis with confetti                   |
| <b>KP</b>   | Non-epidermolytic palmoplantar keratoderma |
| <b>IV</b>   | Ichthyosis vulgaris                        |
| <b>F</b>    | Female                                     |
| <b>M</b>    | Male                                       |

**Supplementary Table S2.** The relationship between demographic, social, educational, and clinical factors and quality of life assessed with the Dermatology Life Quality Index.

| Patient characteristics                  | Values                         | Quality of life                          |                                               | <i>p</i> |
|------------------------------------------|--------------------------------|------------------------------------------|-----------------------------------------------|----------|
|                                          |                                | Severely or very severely reduced [n=13] | Normal, slightly or moderately reduced [n=17] |          |
| Sex                                      | Men                            | 9 (42.9%)                                | 12 (57.1%)                                    | 0.7478   |
|                                          | Women                          | 4 (44.4%)                                | 5 (55.6%)                                     |          |
| Age [years]                              | Median [IQR] (Min-Max)         | 42 [32.7-47]                             | 34 [25.7-48.7]                                | 0.4893   |
| Place of residence                       | City                           | 8 (44.4%)                                | 10 (55.6%)                                    | 0.8215   |
|                                          | Village                        | 5 (41.7%)                                | 7 (58.3%)                                     |          |
| Education                                | Primary, Vocational, Secondary | 8 (53.3%)                                | 7 (46.7%)                                     | 0.4612   |
|                                          | Higher                         | 5 (33.3%)                                | 10 (66.7%)                                    |          |
| Scales on exposed parts of the body      | No                             | 5 (35.7%)                                | 9 (64.3%)                                     | 0.6756   |
|                                          | Yes                            | 8 (50%)                                  | 8 (50%)                                       |          |
| % of the body surface covered by lesions | Median [IQR] (Min-Max)         | 100% [62.5%-100%]                        | 80% [5.5%-98.5%]                              | 0.1439   |
| The whole body is covered in scales      | No                             | 7 (43.7%)                                | 9 (56.2%)                                     | 0.7489   |
|                                          | Yes                            | 6 (42.9%)                                | 8 (57.1%)                                     |          |
| Color of scales                          | Beige, yellow or brown         | 9 (40.9%)                                | 13 (59.1%)                                    | 0.9778   |

|                                             |                        |                |               |         |
|---------------------------------------------|------------------------|----------------|---------------|---------|
|                                             | White                  | 4 (50%)        | 4 (50%)       |         |
| <b>Skin itching</b>                         | Median [IQR] (Min-Max) | 5 [3.7-8.2]    | 4 [2.7-6]     | 0.1085  |
| <b>Redness</b>                              | Median [IQR] (Min-Max) | 6 [5.7-8.2]    | 4 [2-5]       | 0.0019* |
| <b>Exfoliation</b>                          | Median [IQR] (Min-Max) | 8 [4.7-10]     | 7 [3.7-8]     | 0.2626  |
| <b>Infiltration</b>                         | No                     | 8 (47.1%)      | 9 (52.9%)     | 0.9210  |
|                                             | Yes                    | 5 (38.5%)      | 8 (61.5%)     |         |
| <b>Pain (VAS)</b>                           | Median [IQR] (Min-Max) | 3 [0.7-8]      | 1 [0.7-2.5]   | 0.1159  |
| <b>Increased sweating</b>                   | No                     | 7 (35%)        | 13 (65%)      | 0.3619  |
|                                             | Yes                    | 6 (60%)        | 4 (40%)       |         |
| <b>Ectropion</b>                            | No                     | 8 (36.4%)      | 14 (63.6%)    | 0.3893  |
|                                             | Yes                    | 5 (62.5%)      | 3 (37.5%)     |         |
| <b>Sleep disorders</b>                      | No                     | 5 (25%)        | 15 (75%)      | 0.0133* |
|                                             | Yes                    | 8 (80%)        | 2 (20%)       |         |
| <b>Inability to fully close the eyelids</b> | No                     | 8 (47.1%)      | 9 (52.9%)     | 0.9210  |
|                                             | Yes                    | 5 (38.5%)      | 8 (61.5%)     |         |
| <b>Feeling of ear plugging</b>              | No                     | 7 (41.2%)      | 10 (58.8%)    | 0.9210  |
|                                             | Yes                    | 6 (46.2%)      | 7 (53.8%)     |         |
| <b>Hearing loss</b>                         | No                     | 10 (41.7%)     | 14 (58.3%)    | 0.9266  |
|                                             | Yes                    | 3 (50%)        | 3 (50%)       |         |
| <b>Performance status (Karnofsky scale)</b> | Median [IQR] (Min-Max) | 80 [46.2-96.2] | 90 [77.5-100] | 0.2421  |

\* - statistically significant result

**Supplementary Table S3.** The relationship between personality inventory assessed using the NEO-FFI questionnaire and quality of life assessed using the Dermatology Life Quality Index.

| Personality Inventory  | Level    | Quality of life                          |                                               | <i>p</i> |
|------------------------|----------|------------------------------------------|-----------------------------------------------|----------|
|                        |          | Severely or very severely reduced [n=13] | Normal, slightly or moderately reduced [n=17] |          |
| Openness to experience | Low      | 0 (0%)                                   | 2 (100%)                                      | 0.2445   |
|                        | Moderate | 5 (62.5%)                                | 3 (37.5%)                                     |          |
|                        | High     | 8 (40%)                                  | 12 (60%)                                      |          |
| Neuroticism            | Low      | 0 (0%)                                   | 1 (100%)                                      | 0.2214   |
|                        | Moderate | 3 (27.3%)                                | 8 (72.7%)                                     |          |
|                        | High     | 10 (55.6%)                               | 8 (44.4%)                                     |          |
| Agreeableness          | Low      | 1 (100%)                                 | 0 (0%)                                        | 0.0400*  |
|                        | Moderate | 6 (75%)                                  | 2 (25%)                                       |          |
|                        | High     | 6 (28.6%)                                | 15 (71.4%)                                    |          |
| Extroversion           | Moderate | 4 (44.4%)                                | 5 (55.6%)                                     | 0.7478   |
|                        | High     | 9 (42.9%)                                | 12 (57.1%)                                    |          |
| Scrupulousness         | Low      | 6 (66.7%)                                | 3 (33.3%)                                     | 0.1983   |
|                        | Moderate | 7 (33.3%)                                | 14 (66.7%)                                    |          |
|                        | High     |                                          |                                               |          |

\* - statistically significant result

**Supplementary Table S4.** The relationship between demographic, social, educational, and clinical factors with the occurrence of depression (according to Beck's scale).

| Patient characteristics                         | Values                         | Depression       |                | <i>p</i> |
|-------------------------------------------------|--------------------------------|------------------|----------------|----------|
|                                                 |                                | No<br>[n=17]     | Yes<br>[n=13]  |          |
| <b>Sex</b>                                      | Men                            | 11 (52.4%)       | 10 (47.6%)     | 0.7478   |
|                                                 | Women                          | 6 (66.7%)        | 3 (33.3%)      |          |
| <b>Age [years]</b>                              | Median [IQR] (Min-Max)         | 34 [24.7-48]     | 42 [33.2-47.2] | 0.3352   |
| <b>Place of residence</b>                       | City                           | 10 (55.6%)       | 8 (44.4%)      | 0.8215   |
|                                                 | Village                        | 7 (58.3%)        | 5 (41.7%)      |          |
| <b>Education</b>                                | Primary, Vocational, Secondary | 8 (53.3%)        | 7 (46.7%)      | 1.0000   |
|                                                 | Higher                         | 9 (60%)          | 6 (40%)        |          |
| <b>Scales on exposed parts of the body</b>      | No                             | 8 (57.1%)        | 6 (42.9%)      | 0.7489   |
|                                                 | Yes                            | 9 (56.2%)        | 7 (43.7%)      |          |
| <b>% of the body surface covered in lesions</b> | Median [IQR] (Min-Max)         | 90% [17.5%-100%] | 80% [4%-100%]  | 0.4391   |
| <b>The whole body is covered in scales</b>      | No                             | 10 (62.5%)       | 6 (37.5%)      | 0.7489   |
|                                                 | Yes                            | 7 (50%)          | 7 (50%)        |          |
| <b>Color of scales</b>                          | Beige, yellow or brown         | 13 (59.1%)       | 9 (40.9%)      | 0.9778   |
|                                                 | White                          | 4 (50%)          | 4 (50%)        |          |

|                                             |                        |               |             |         |
|---------------------------------------------|------------------------|---------------|-------------|---------|
| <b>Skin itching</b>                         | Median [IQR] (Min-Max) | 4 [3-5]       | 7 [3.7-8.2] | 0.0238* |
| <b>Redness</b>                              | Median [IQR] (Min-Max) | 5 [3-6]       | 6 [3.5-8.2] | 0.3421  |
| <b>Exfoliation</b>                          | Median [IQR] (Min-Max) | 5 [3-8]       | 9 [6.2-10]  | 0.0518  |
| <b>Infiltrations</b>                        | No                     | 9 (52.9%)     | 8 (47.1%)   | 0.9210  |
|                                             | Yes                    | 8 (61.5%)     | 5 (38.5%)   |         |
| <b>Pain (VAS)</b>                           | Median [IQR] (Min-Max) | 1 [0-3.5]     | 2 [1-8]     | 0.1950  |
| <b>Increased sweating</b>                   | No                     | 12 (60%)      | 8 (40%)     | 0.8964  |
|                                             | Yes                    | 5 (50%)       | 5 (50%)     |         |
| <b>Ectropion</b>                            | No                     | 14 (63.6%)    | 8 (36.4%)   | 0.3893  |
|                                             | Yes                    | 3 (37.5%)     | 5 (62.5%)   |         |
| <b>Sleep disorders</b>                      | No                     | 13 (65%)      | 7 (35%)     | 0.3619  |
|                                             | Yes                    | 4 (40%)       | 6 (60%)     |         |
| <b>Inability to fully close the eyelids</b> | No                     | 10 (58.8%)    | 7 (41.2%)   | 0.9210  |
|                                             | Yes                    | 7 (53.8%)     | 6 (46.2%)   |         |
| <b>Feeling of ear plugging</b>              | No                     | 10 (58.8%)    | 7 (41.2%)   | 0.9210  |
|                                             | Yes                    | 7 (53.8%)     | 6 (46.2%)   |         |
| <b>Hearing loss</b>                         | No                     | 15 (62.5%)    | 9 (37.5%)   | 0.4071  |
|                                             | Yes                    | 2 (33.3%)     | 4 (66.7%)   |         |
| <b>Performance status (Karnofsky scale)</b> | Median [IQR] (Min-Max) | 90 [77.5-100] | 85 [50-100] | 0.5374  |

\* - statistically significant result

**Supplementary Table S5.** The relationship between personality inventory assessed using the NEO-FFI questionnaire and the occurrence of depression assessed using Beck`s scale in the study group.

| Personality Inventory         | Level    | Depression   |               | <i>p</i> |
|-------------------------------|----------|--------------|---------------|----------|
|                               |          | No<br>[n=17] | Yes<br>[n=13] |          |
| <b>Openness to experience</b> | Low      | 1 (50%)      | 1 (50%)       | 0.8731   |
|                               | Moderate | 4 (50%)      | 4 (50%)       |          |
|                               | High     | 12 (60%)     | 8 (40%)       |          |
| <b>Neuroticism</b>            | Low      | 1 (100%)     | 0 (0%)        | 0.0067*  |
|                               | Moderate | 10 (90.9%)   | 1 (9.1%)      |          |
|                               | High     | 6 (33.3%)    | 12 (66.7%)    |          |
| <b>Agreeableness</b>          | Low      | 0 (0%)       | 1 (100%)      | 0.0400*  |
|                               | Moderate | 2 (25%)      | 6 (75%)       |          |
|                               | High     | 15 (71.4%)   | 6 (28.6%)     |          |
| <b>Extroversion</b>           | Moderate | 3 (33.3%)    | 6 (66.7%)     | 0.1983   |
|                               | High     | 14 (66.7%)   | 7 (33.3%)     |          |
| <b>Scrupulousness</b>         | Low      | 3 (33.3%)    | 6 (66.7%)     | 0.1983   |
|                               | Moderate | 14 (66.7%)   | 7 (33.3%)     |          |
|                               | High     |              |               |          |

\* - statistically significant result
